# Supplementary material for: The complete chloroplast genome sequences of three Broussonetia species and comparative analysis within the Moraceae
Source: PeerJ journal article supplement (doi:10.7717/peerj.14293), 2022-10-31

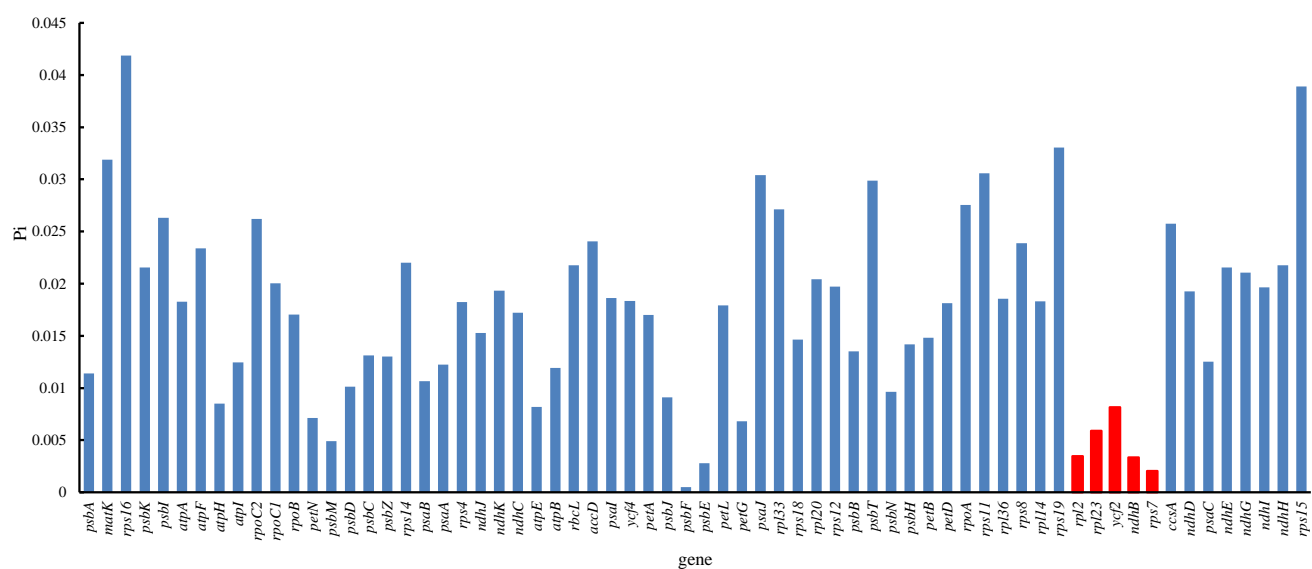

Supplement: NewFigS1.pdf [file NewFigS1.pdf]
